# Supplementary material for: Synthesis and biological evaluation of primaquine–chloroquine twin drug: a novel heme-interacting molecule prevents free heme and hydroxyl radical-mediated protein degradation
Source: Royal Society of Chemistry journal article supplement (doi:10.1039/c3md00019b), 2013-01-01

## **Supporting Information**

### **Synthesis and biological evaluation of primaquine- chloroquine twin drug: A novel heme-interacting molecule prevents free heme and hydroxyl radical-mediated protein degradation**

**Chinmay Pal <sup>a</sup>, Souvik Sarkar <sup>a</sup>, Somnath Mazumder <sup>a</sup>, Susanta Adhikari <sup>b\*</sup>,  
Uday Bandyopadhyay <sup>a\*</sup>**

*<sup>a</sup> Department of Infectious Diseases and Immunology, CSIR-Indian Institute of Chemical Biology, 4 Raja S. C. Mullick Road, Jadavpur, Kolkata 700032, West Bengal, India.*

*<sup>b</sup> Department of Chemistry, University of Calcutta, 92, A. P. C. Road, Kolkata-700 009, West Bengal, India*

**7-chloro-N-(4-(6-methoxyquinolin-8-ylamino) pentyl) quinolin-4-amine :( PQCL)**

**<sup>1</sup>H NMR (600 MHz, CDCl<sub>3</sub>)**

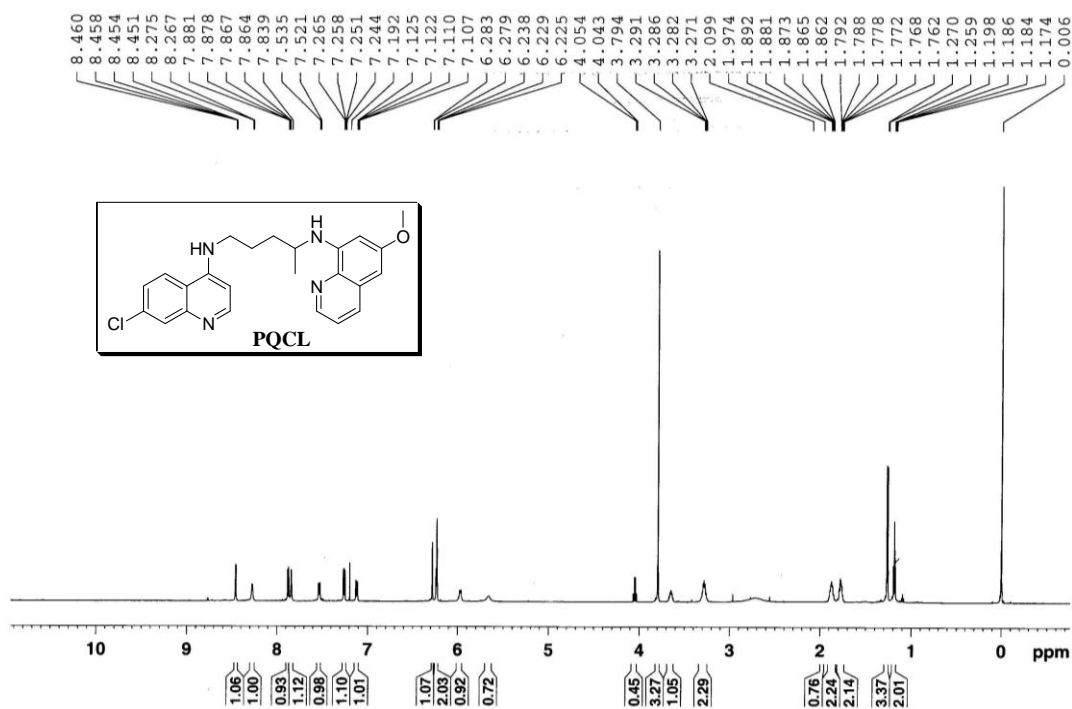

**Expanded**

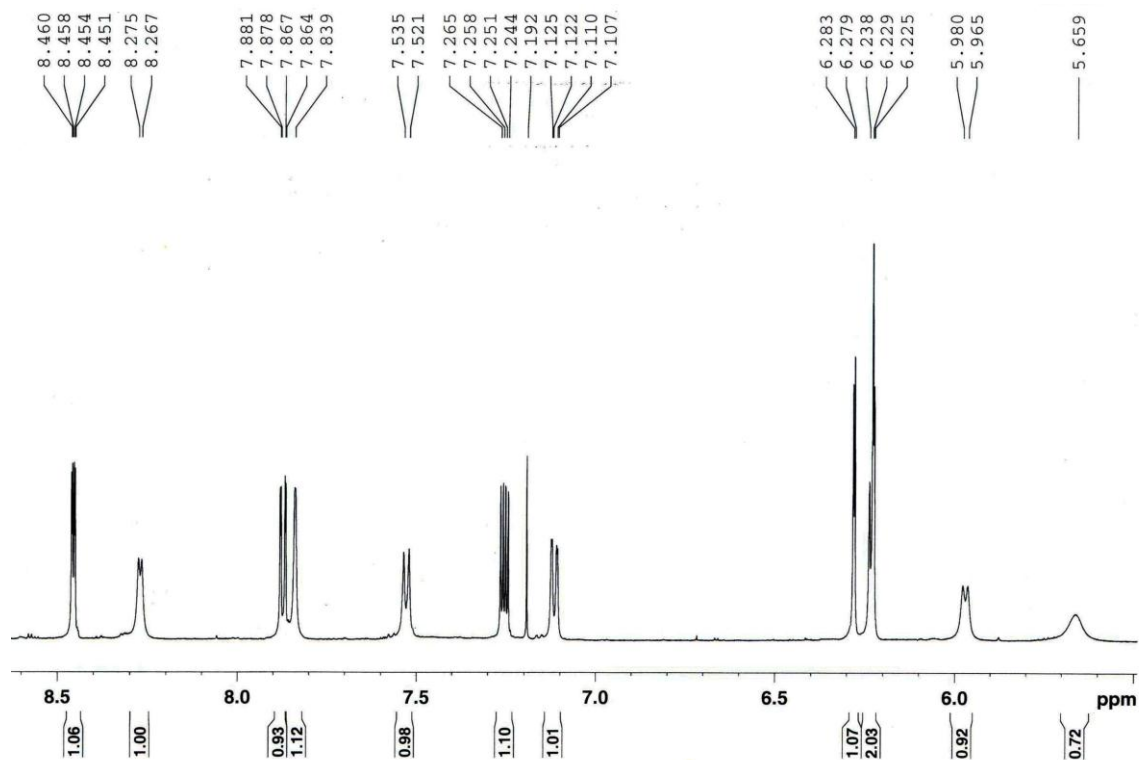

**$^{13}\text{C}$  NMR (150 MHz,  $\text{CDCl}_3$ )**

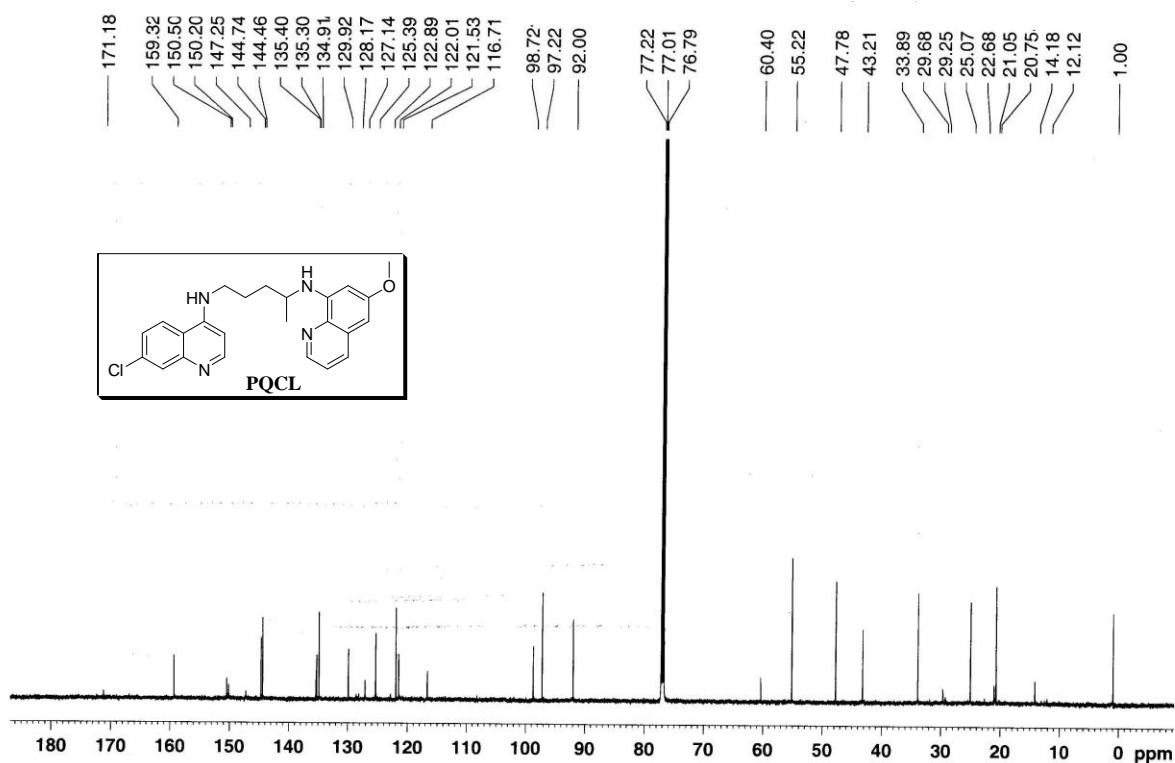

**DEPT EXPERIMENT**

PC1 DEPT-90

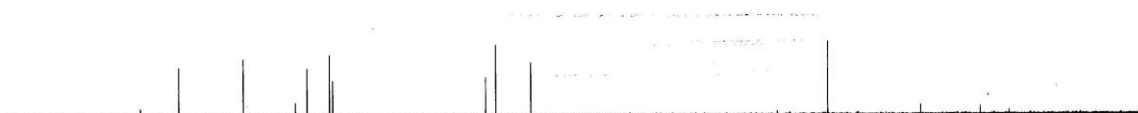

PC1 DEPT-135

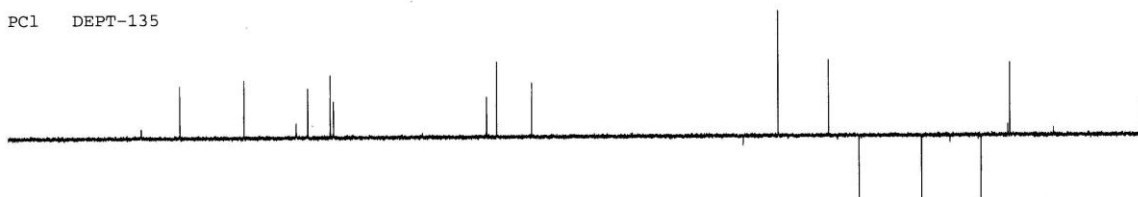

PC1  $^{13}\text{C}$ -NMR in  $\text{CDCl}_3$

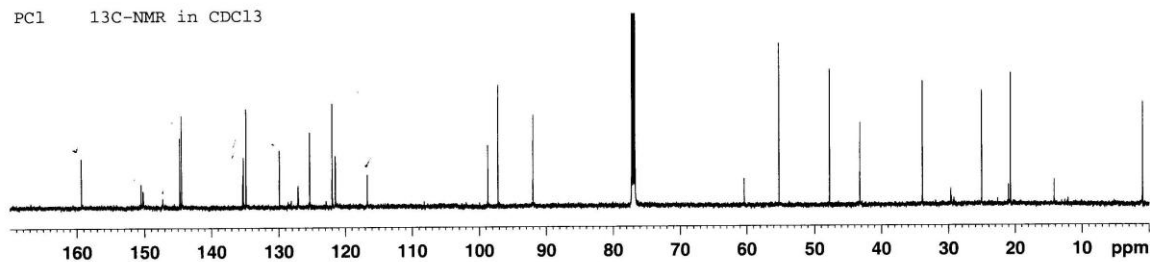

Supplement: c3md00019b.pdf [file c3md00019b.pdf]
